# Supplementary material for: On the linear representation of numbers: evidence from a new two-numbers-to-two positions task
Source: Springer Nature journal article supplement (doi:10.1007/s00426-018-1063-y), 2018-08-02
Supplement: MOESM1 [file 15998984]

## Sheet: Distance
				Mean Distance
				1		2		3		4		5		6		7		8
Subject	Gender	Hand	CondRT	left	right	left	right	left	right	left	right	left	right	left	right	left	right	left	right
1	female	right	no instruction	1.01838	1.07563	2.20588	2.14706	3.15931	3.31373	4.51471	4.51765	5.69485	5.72059	5.84314	5.56373	7.41176	7.35294	8.23529	8.01471
2	female	right	no instruction	1.19301	1.125	1.95833	2.27521	2.93627	3.18627	4.06765	4.21324	5.26103	5.17279	6.17157	6.4902	7.08088	7.02206	7.52941	8.01471
3	male	left	no instruction	1.21324	1.14522	2.12605	3.18627	3.19118	3.18627	4.54044	4.52353	5.82353	5.76961	6.83333	7.10784	7.375	7.46324	8.57353	8.25
4	male	right	no instruction	1.07721	1.0239	2.05462	2.09664	3.02451	2.91912	4.21691	4.07059	4.91912	5.22426	5.93627	6.13235	6.98529	6.91176	7.70588	7.82353
5	male	left	no instruction	1.07143	1.17647	2.16597	2.18627	3.08088	3.14461	4.07941	4.26838	5.0625	5.04044	6.05882	5.95588	7.61029	6.55147	8.07353	7.23529
6	female	left	no instruction	1.23713	1.25	2.21429	2.29202	3.00245	3.13725	4.19412	4.03824	5.11029	5.07721	5.82353	6.50735	6.66176	6.54412	7.73529	7.73529
7	female	right	no instruction	1.05882	0.988971	1.88725	1.94328	3.12255	3.26765	3.91471	4.21176	4.75735	5.25735	6.14706	6.53922	7.08088	7.21324	8.36765	8.19118
8	female	right	no instruction	0.946078	1.00184	1.92857	1.77731	3.21569	3.1299	4.34412	4.47941	5.32721	5.33456	6.36275	6.22549	7.45588	7.43382	8.22059	8.19118
9	female	left	no instruction	1.06303	1.01103	2.02521	2.04202	3.1201	3.17892	4.25	4.26471	5.32353	5.20956	6.17157	5.88725	7.07353	6.97794	7.83824	8.32353
10	female	right	no instruction	1.14154	1.07169	2.03992	2.13235	3.04902	3.11765	4.22647	4.13235	5.07721	4.87255	6.01471	5.78922	6.94853	6.73529	8.92647	8.70588
11	male	right	instruction	1.12684	1.09191	2.10084	2.10504	3.1201	3.04902	4.16471	4.29118	4.96324	5.29412	6.21569	6.16176	6.94853	6.92647	8.08824	8.04412
12	female	right	instruction	0.90625	0.930147	1.89461	2.14706	3.11029	3.46569	4.43235	4.52059	5.38603	5.70588	6.58333	6.59314	7.29412	7.25735	8.36765	8.36765
13	male	right	instruction	1.02022	0.913866	2.17857	2.25735	3.76225	3.52941	4.54412	4.68529	6.11397	6.22794	7.14706	7.09314	7.95588	7.875	8.30882	8.33824
14	female	left	instruction	1.13787	1.22243	2.02941	2.05672	3.14216	3	4.22059	3.97647	5.22426	4.90074	6.06373	5.71569	6.68382	6.85294	8.02941	8
15	female	right	instruction	1.19301	1.07169	2.12815	1.94328	3.22059	3.02206	4.37353	4.47941	5.67647	5.28676	6.44608	6.59314	7.08088	7.30147	8.20588	7.79412
16	female	right	instruction	1.10478	1.08456	1.96849	1.89286	3.13725	3.55588	4.60882	4.51765	5.55882	5.70588	6.65196	6.27206	7.11765	7.44853	8.5	8.44118
17	female	right	instruction	1.0105	1.02574	1.97059	2.10924	3.08824	2.93627	4.20588	4.25882	5.25735	5.05882	6.33088	6.20098	7.01471	7.21324	7.98529	8.16176
18	female	right	instruction	1.02941	1.12684	1.9979	2.09244	3.19118	3.19853	4.29706	4.31471	4.89706	5.32721	6.33333	6.43137	7.35294	7.17647	7.82353	7.5
19	female	left	instruction	1.15074	1.27206	2.06513	2.0084	3.29167	2.98529	3.95	4.36176	4.77206	5.13603	5.38235	5.84314	6.22059	6.63971	7.75	6.76471
20	female	right	instruction	1.24816	1.16728	2.23109	2.05462	3.06471	3.01716	4.03824	4.05294	4.88971	5.14706	5.83333	6.17157	6.42647	6.5	7.91176	7.86765

## Sheet: DistanceRT
				Mean Distance RT
				1		2		3		4		5		6		7		8
Subject	Gender	Hand	CondRT	left	right	left	right	left	right	left	right	left	right	left	right	left	right	left	right
1	female	right	no instruction	215.75	182.571	228.167	232.286	232.833	209.667	228.8	166.6	224.75	157	168.667	284.667	176.5	235	206	344
2	female	right	no instruction	210.5	167.875	145.833	172.714	60.6667	184	124.8	149.5	126.5	119.75	108.333	113.333	42	85	169	136
3	male	left	no instruction	89.625	57.5	130.857	108.857	181.5	94.5	73.25	174.4	241.5	173.333	259.333	101.667	41.5	168	172	308
4	male	right	no instruction	218.875	280.5	292.714	241.857	212.167	264	288	392.8	390.25	235	266.667	677.333	341	418.5	343	66
5	male	left	no instruction	202.286	154.25	147.857	123	136	135.167	56	159	98.75	105.25	78.6667	109.333	3.5	287.5	5	241
6	female	left	no instruction	382.875	296	291.286	459.857	489	410.167	409.4	306.2	362.5	367.25	568	575	256	253.5	6	442
7	female	right	no instruction	299	331.875	276.667	361	259.833	483.6	556	458.8	360	516.75	238	427.667	597.5	14	647	9
8	female	right	no instruction	231.333	127.875	160.571	191.857	148.667	181.833	158	211.8	96.5	132.25	97	164.333	174	120.5	175	19
9	female	left	no instruction	261.714	96.25	226	111.143	169.333	126.833	223.2	220	157.5	198.5	294	145.667	285.5	218	152	119
10	female	right	no instruction	190.5	125.25	83.1429	215.429	150.5	63.6667	75.6	130.8	73.75	271.667	136.667	195.333	22	38.5	32	8
11	male	right	instruction	505.625	372.375	376	405.714	401.333	457.5	419.2	418	281.75	448.5	281	351	416.5	293	579	343
12	female	right	instruction	67.125	16.625	51.6667	14.6667	82.5	145	137	118	103.75	22.75	29.6667	11.3333	7.5	51.5	7	7
13	male	right	instruction	85.375	88.8571	76.5714	29.1667	55	116.333	109.8	112.4	108.25	71.25	98	31	66	41.5	225	40
14	female	left	instruction	140.125	213.25	228.833	259	144.5	208.333	128	266.4	262.75	157.5	308	280.333	237	254.5	222	131
15	female	right	instruction	81.5	52.5	106.143	61.4286	104	57.8333	61.8	113.6	76.3333	68	122.333	93.3333	93.5	185.5	6	2
16	female	right	instruction	101.25	111.625	88.7143	88.7143	133.833	123.8	96.8	92.6	132.25	106.25	202	216	7	96	292	1
17	female	right	instruction	64.1429	47.75	65.5714	42.7143	44.6667	105.667	24.2	10.4	5	87.3333	59.5	82.6667	36.5	51.5	89	6
18	female	right	instruction	624.25	634.875	547.857	581.571	642.667	592.667	518.8	478.4	566.25	505.5	628.333	564	431.5	627	642	474
19	female	left	instruction	175	146.25	238.857	219.143	100	165.333	196.2	114.6	148.75	174	76	225.333	1	191.5	350	471
20	female	right	instruction	180.75	208.625	185	134.571	211.6	149.167	109	144.4	261	86	152.667	136.667	247.5	244	89	122

## Sheet: Numbers
				Mean Estimation Number
				1		2		3		4		5		6		7		8		9
Subject	Gender	Hand	CondRT	left	right	left	right	left	right	left	right	left	right	left	right	left	right	left	right	left	right
1	female	right	no instruction	0.829044	0.895221	1.86213	1.84559	2.78125	2.72426	3.78309	3.65441	4.9614	4.85714	6.43137	6.32537	7.32904	7.54044	8.27941	8.2416	8.83456	8.90625
2	female	right	no instruction	1.00368	0.926471	1.79044	1.79228	2.78125	2.71324	3.88866	3.75919	5.07169	4.96218	5.98897	5.90966	7.06801	6.96691	8.05882	8.02941	8.92857	8.95037
3	male	left	no instruction	0.810662	0.859244	1.60478	1.6011	2.58456	2.44485	3.74081	3.63971	5.03992	4.97426	6.0084	6.31434	7.37684	7.32169	8.25919	8.23162	9.09926	9.10294
4	male	right	no instruction	1.02521	1.04044	2.01838	2.00368	2.8511	2.97426	4.12868	3.84743	4.9136	4.82143	5.92647	6.02574	6.97426	7.05515	7.84559	7.84559	8.94853	8.93015
5	male	left	no instruction	0.987132	0.935662	1.82353	1.95221	2.80147	2.7584	3.72059	3.70588	5.09375	4.93382	6.2739	5.9761	6.86275	7.13419	7.76287	8.06801	8.8511	8.9136
6	female	left	no instruction	1.05699	1.16544	2.06434	2.05252	3.01471	2.8511	3.69485	3.63051	4.96875	4.95037	6.13235	6.09743	7.00368	7.07169	7.88655	7.79228	8.81985	8.81985
7	female	right	no instruction	0.928571	0.904412	2.0239	1.85662	3.15441	3.04832	4.0864	3.93382	5.2114	5.13603	6.08456	6.09454	7.15074	7.09191	8.13971	8.07721	9.14706	9.15809
8	female	right	no instruction	0.882353	0.869485	1.78151	1.76287	2.69118	2.78992	3.74265	3.75368	4.93908	4.93199	5.96691	6.11555	7.125	7.03309	8.09007	8.13603	9.13971	9.11581
9	female	left	no instruction	0.84375	0.805147	1.92096	1.89706	2.99816	3.00735	3.99081	3.98897	5.10294	5.04044	6.21691	6.19538	7.13051	7.2886	8.11949	8.20404	9.14338	9.15441
10	female	right	no instruction	0.810662	0.716912	1.99449	2.1011	2.93934	2.9979	3.94301	3.89522	5.07169	5.0864	6.12684	6.15809	7.07904	7.06066	7.77941	7.93199	8.79228	8.86397
11	male	right	instruction	0.933824	1.01471	1.99816	1.94669	2.9136	2.90257	3.93934	3.95772	5.08824	4.98529	5.99449	5.99632	7.22794	7.08456	8.01838	8.0864	9.04596	9.05699
12	female	right	instruction	0.773109	0.815126	1.75735	1.57169	2.54622	2.46324	3.73319	3.54963	4.93015	4.91912	6.05882	5.97689	7.3989	7.25184	8.04963	8.08088	9.20772	9.21008
13	male	right	instruction	0.784926	0.808824	1.35662	1.51838	2.19669	2.1636	3.59375	3.63235	5.02574	5.02574	6.24081	6.43277	7.83193	7.5084	8.38051	8.50919	9.22689	9.1489
14	female	left	instruction	1.04412	1.00368	1.84007	1.96875	2.84191	2.875	3.73713	3.82904	4.93199	4.92279	6.06303	5.99816	6.84743	7.07169	7.90756	7.77521	8.80331	8.92463
15	female	right	instruction	0.911765	0.917279	1.52101	1.7261	2.17463	2.43015	3.68566	3.55147	4.95221	4.95221	5.8125	5.96507	7.22978	7.16807	7.81985	8.04044	9.09375	8.94853
16	female	right	instruction	0.904412	0.847426	1.76654	1.67437	2.51287	2.5239	3.45588	3.72059	5.05699	4.94853	6.23713	6.42437	7.33088	7.1636	8.20798	8.06618	9.03151	9.04412
17	female	right	instruction	0.92437	0.893382	1.86555	1.75919	2.60478	2.75	3.92279	3.96639	5.04596	4.97059	6.00919	6.02022	6.91728	6.93277	8.04412	8.05882	9.08613	9.02574
18	female	right	instruction	0.946691	0.957721	1.88603	1.79963	2.75184	2.81066	3.76471	3.65074	5.03676	4.95404	6.13787	6.18382	7.26654	7.06801	8.12132	8.13235	8.99081	8.98162
19	female	left	instruction	1.16912	1.0239	2.01838	1.875	2.53493	2.64706	3.61581	3.4614	4.8511	4.71507	5.56801	5.7739	6.72243	6.66176	7.65809	7.40993	8.65257	8.78676
20	female	right	instruction	1.1636	1.04228	2.09244	2.10662	3.09191	2.93934	3.90809	4.03493	5.10478	5.05042	6.15809	6.19301	7.03125	7.18934	8.04963	8.02941	8.84191	8.8364
